# Supplementary material
Source: PubMed Central journal article supplement (PMC1182407)

# Alpha-1-antitrypsin

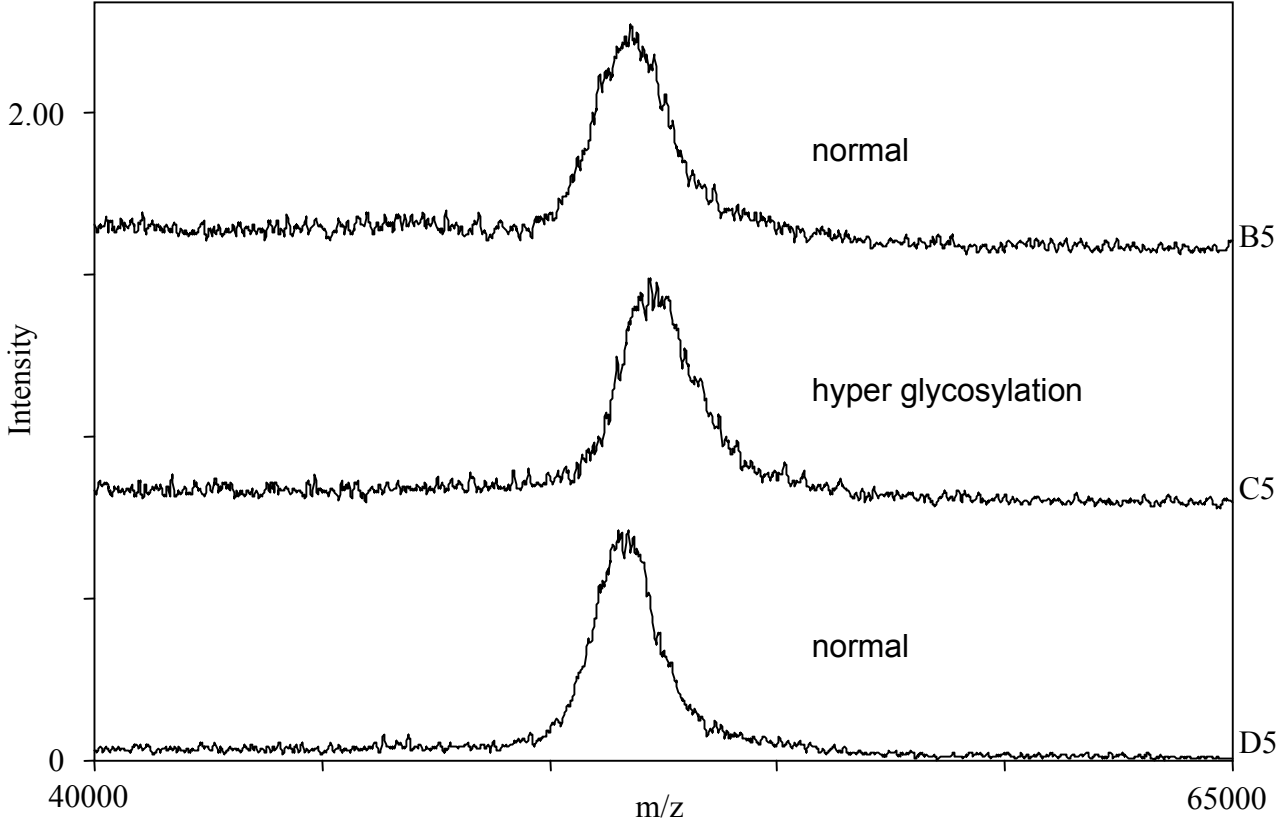

# Antithrombin III

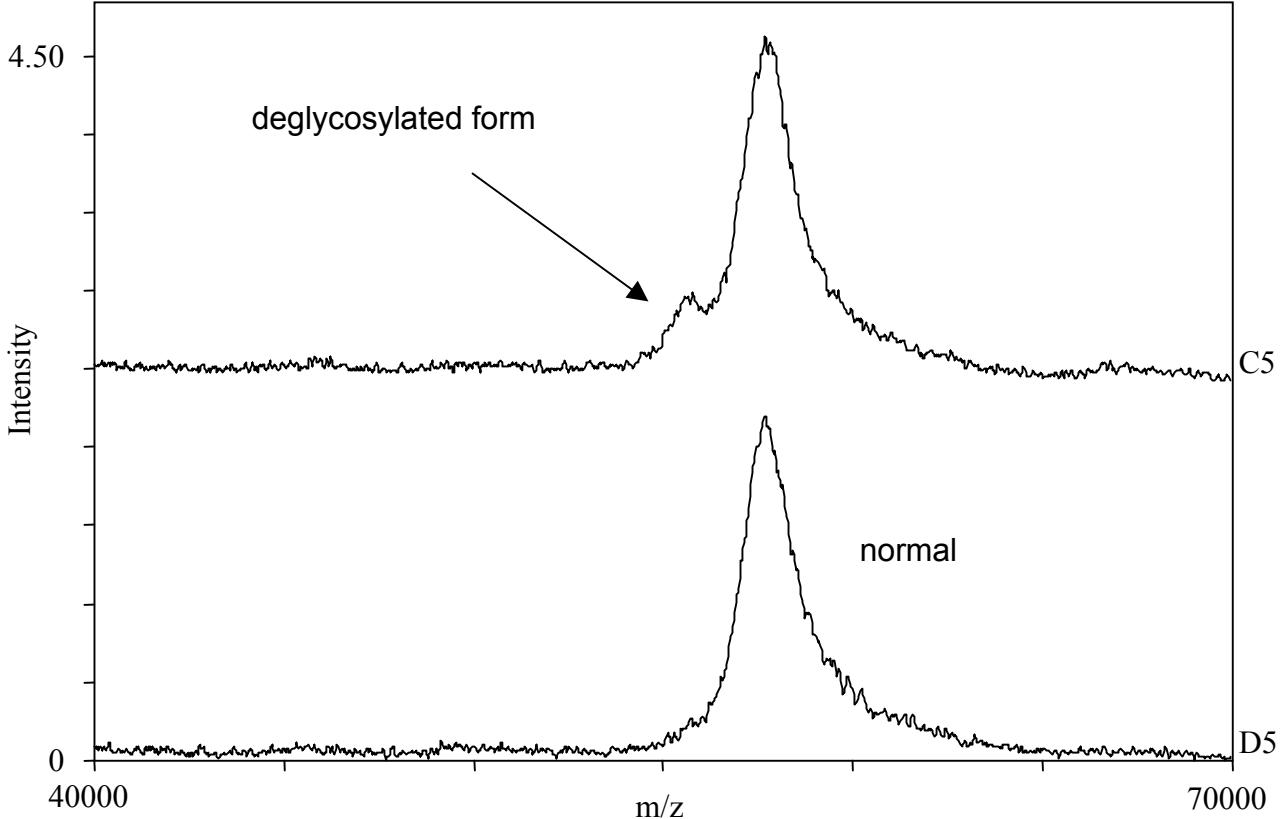

# Apolipoprotein A-I

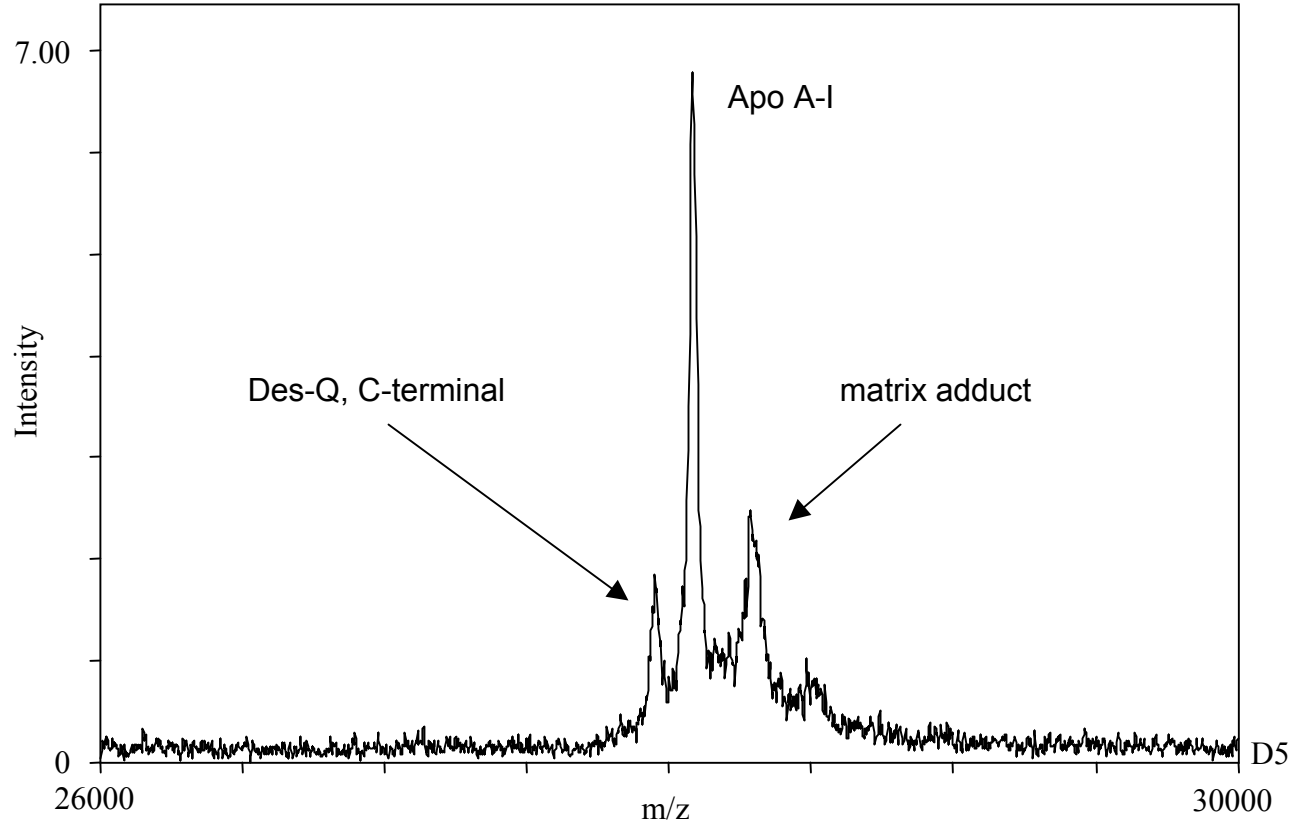

# Apolipoprotein A-II

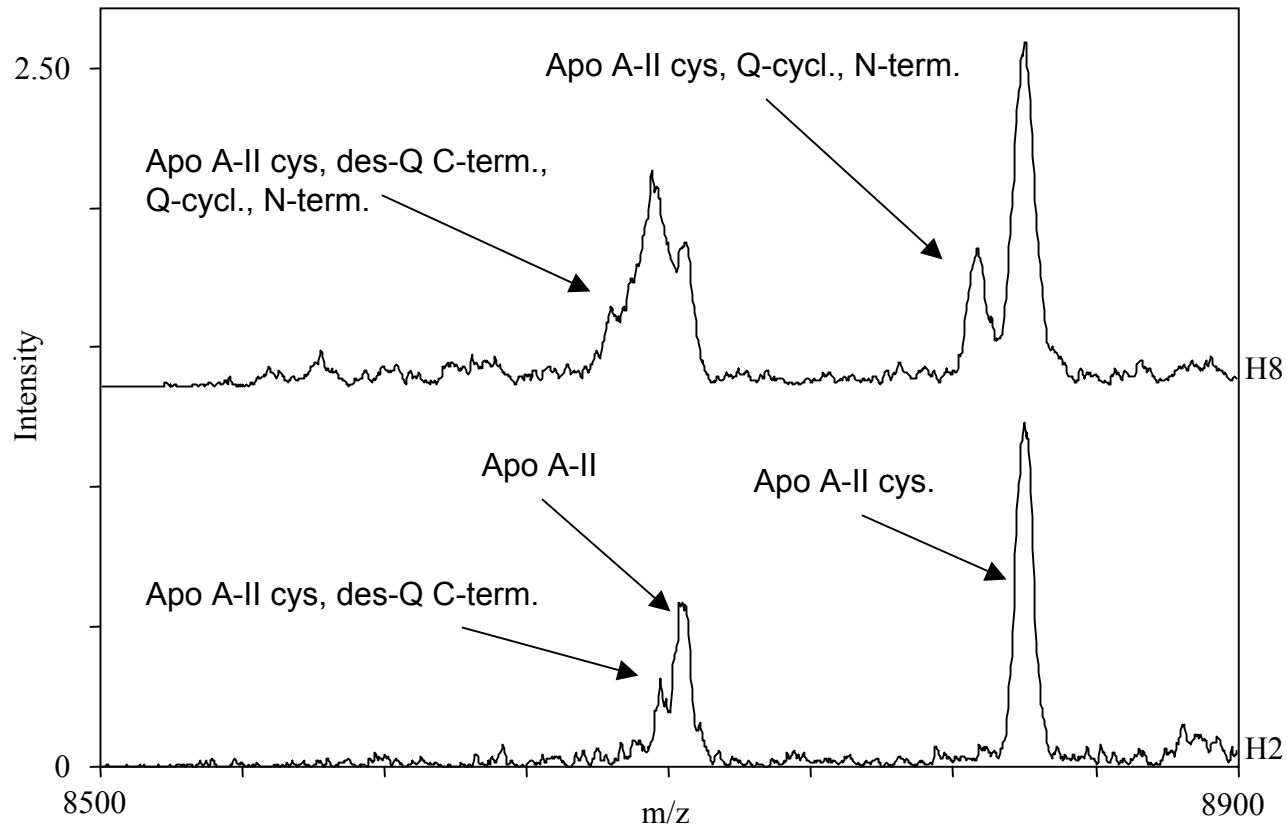

# Apolipoprotein C-I

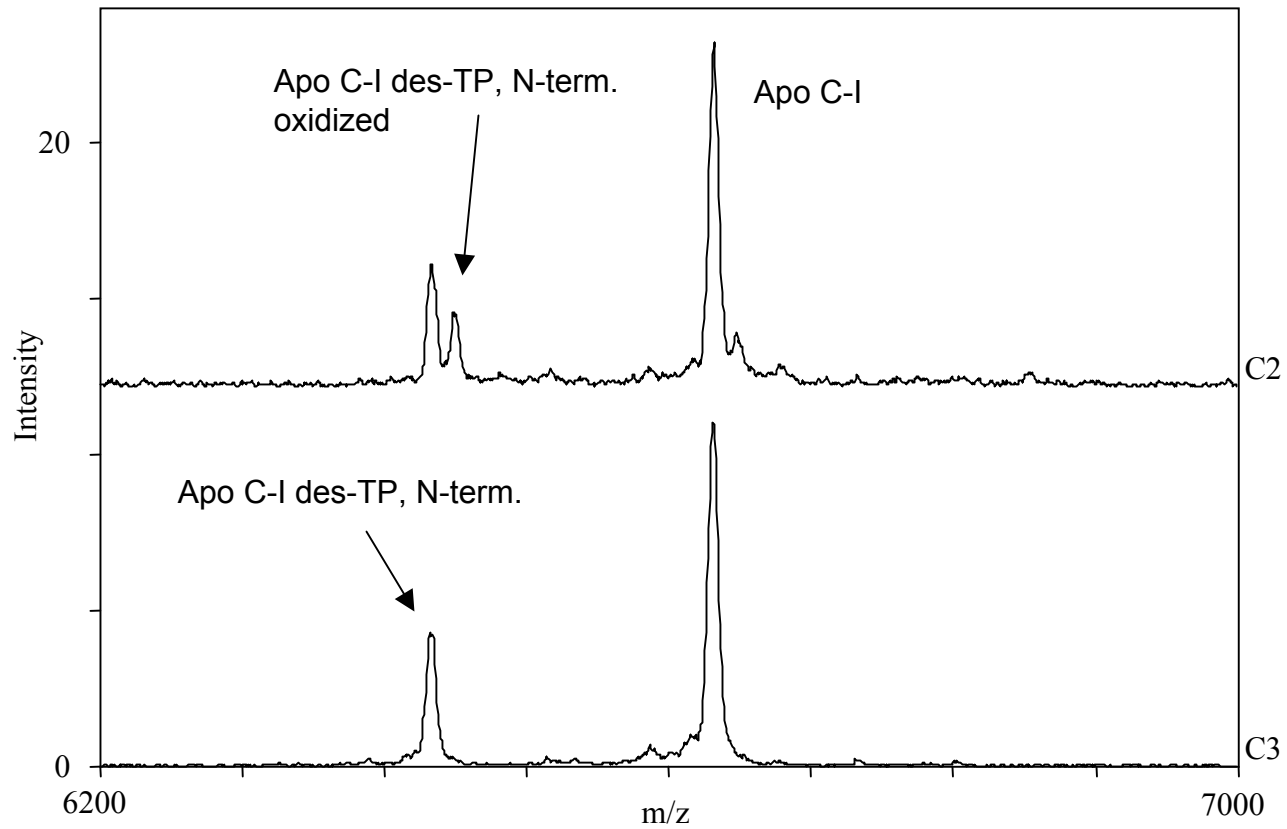

# Apolipoprotein C-II

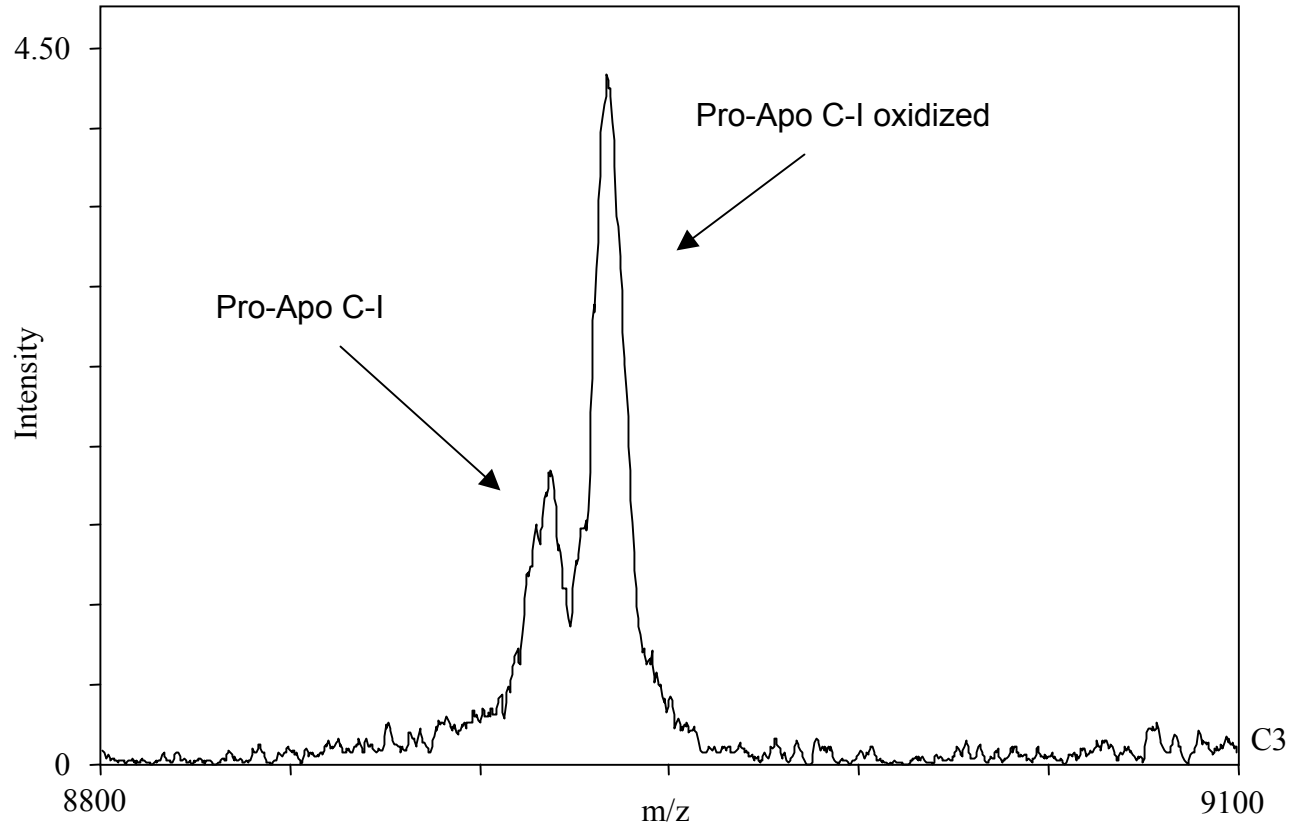

# Apolipoprotein C-III

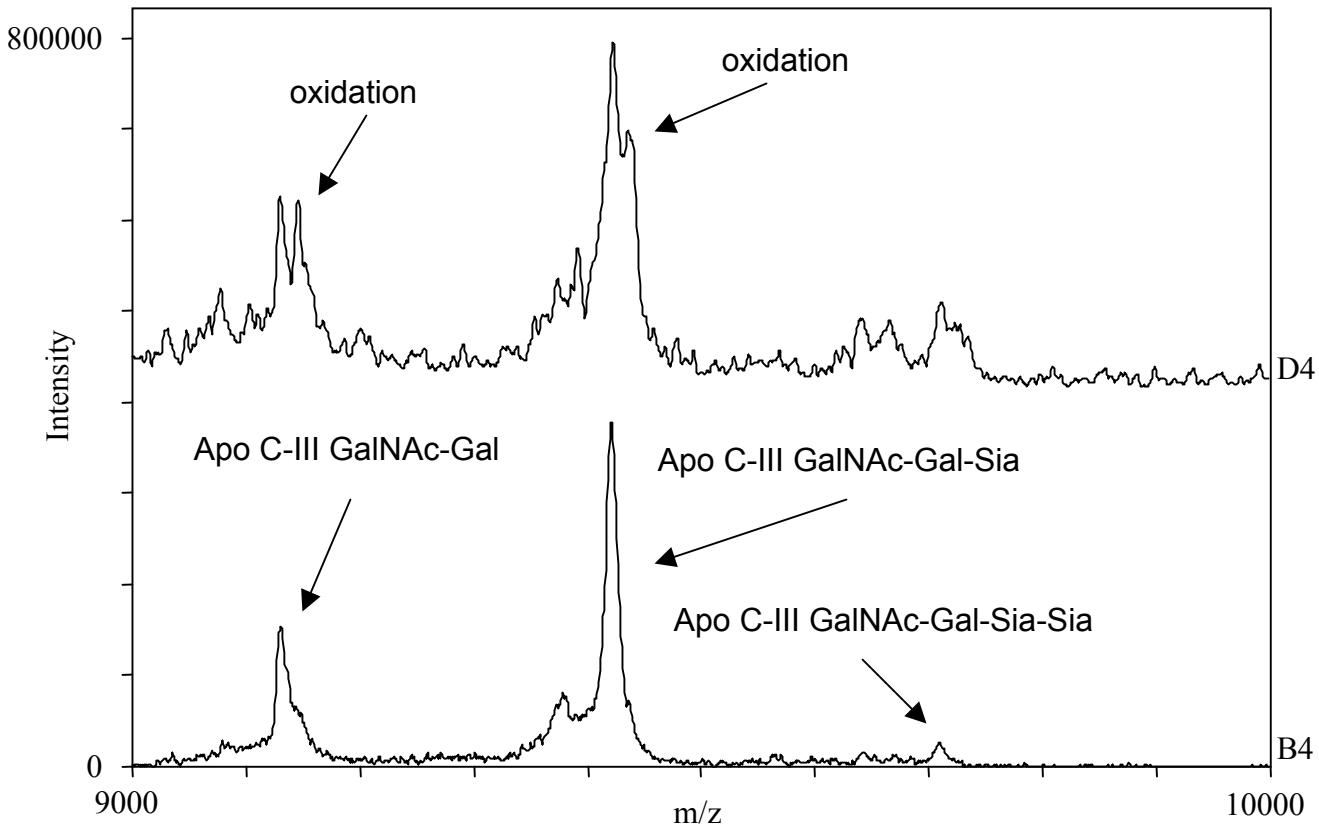

# Apolipoprotein E

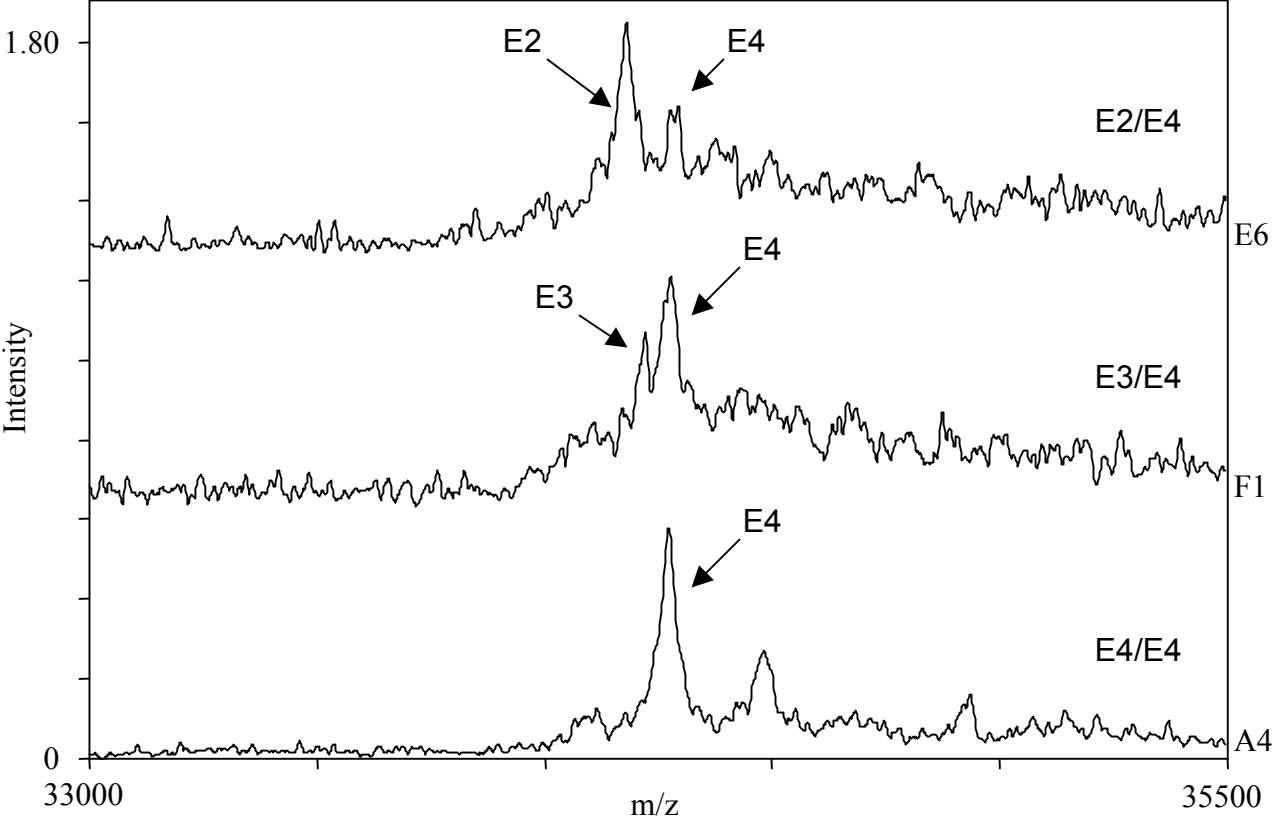



# Apolipoprotein E

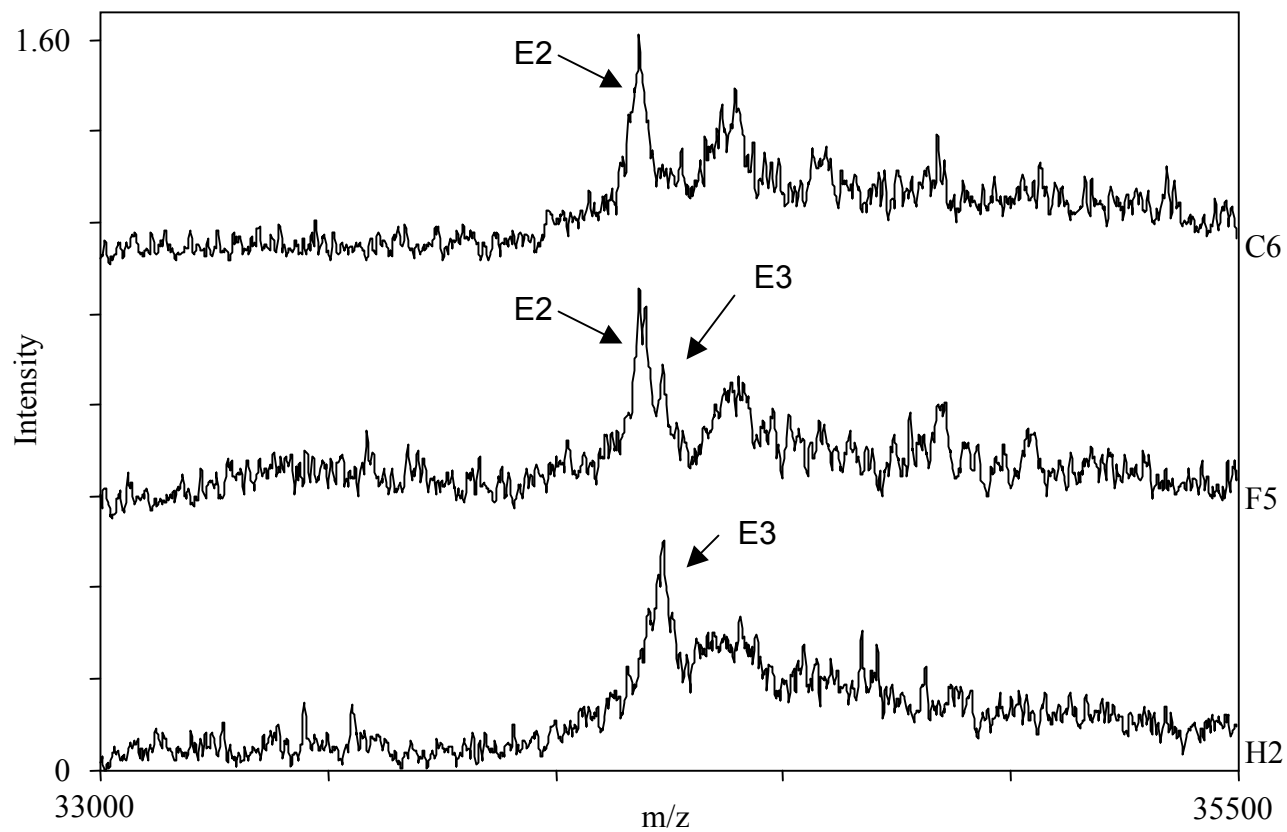

# Apolipoprotein E

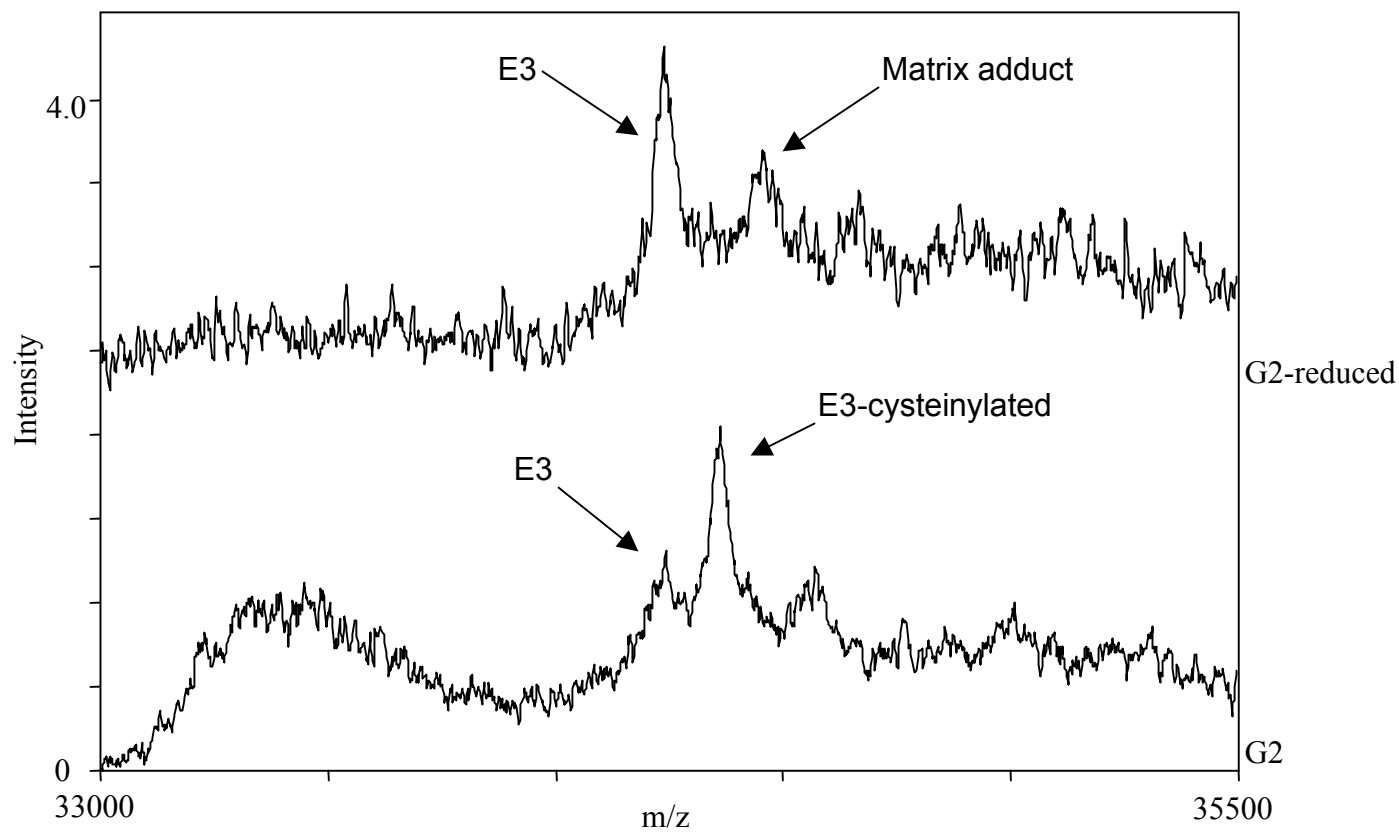

# Beta-2-microglobulin

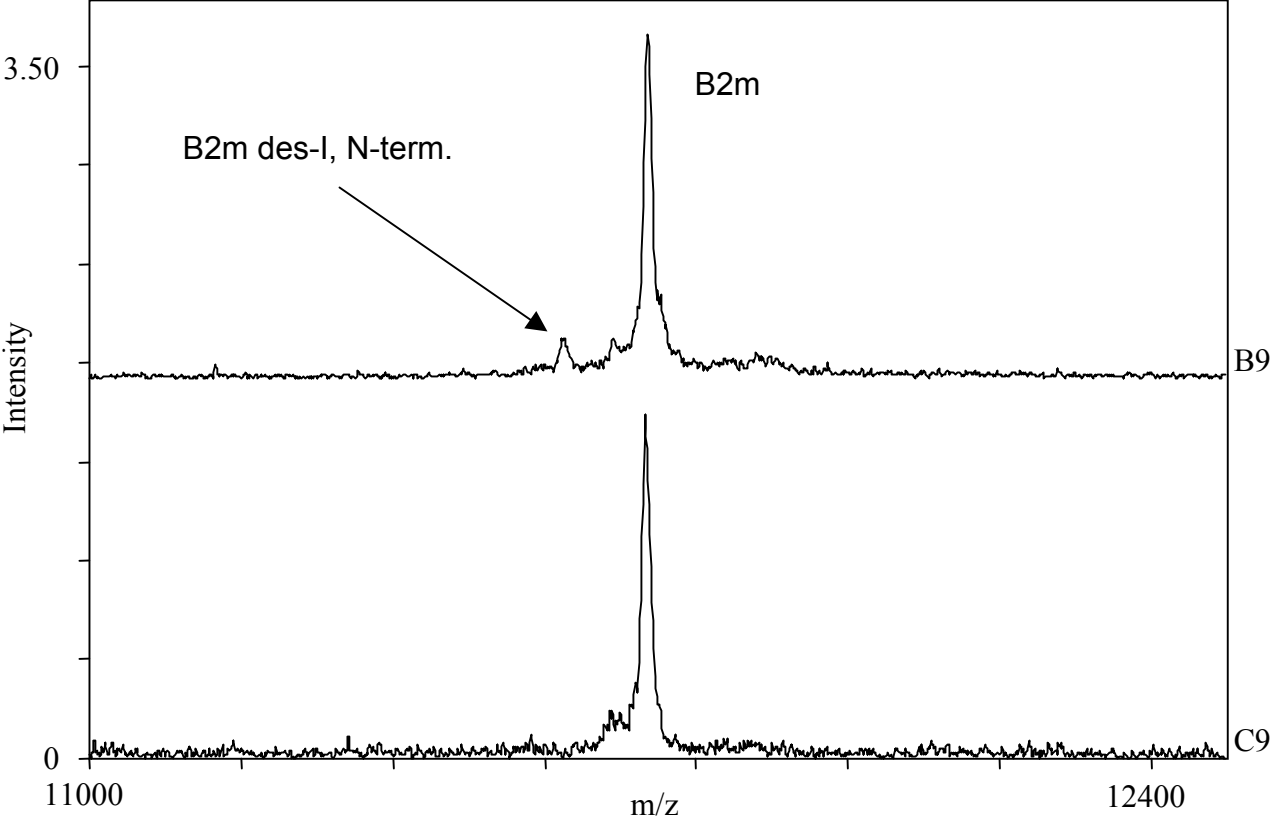

# Cystatin C

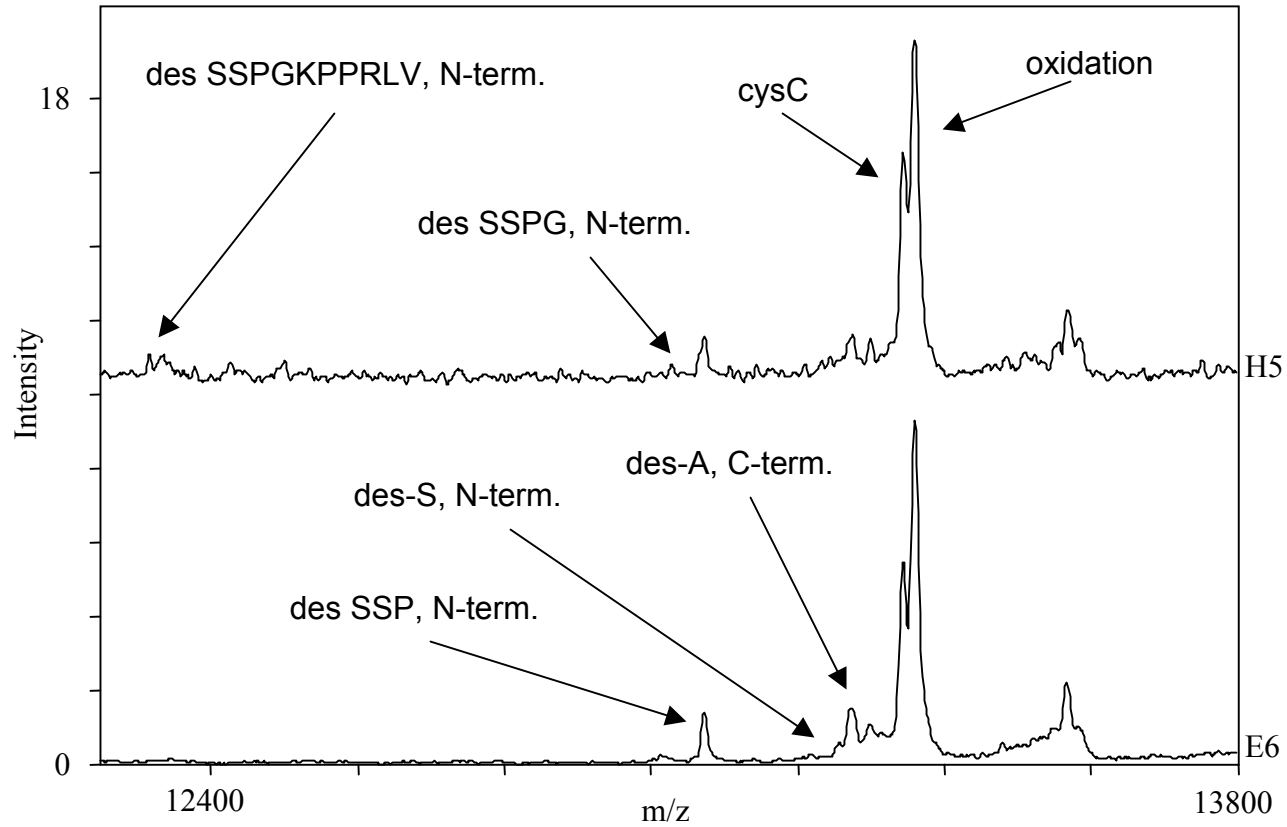

# Cystatin C

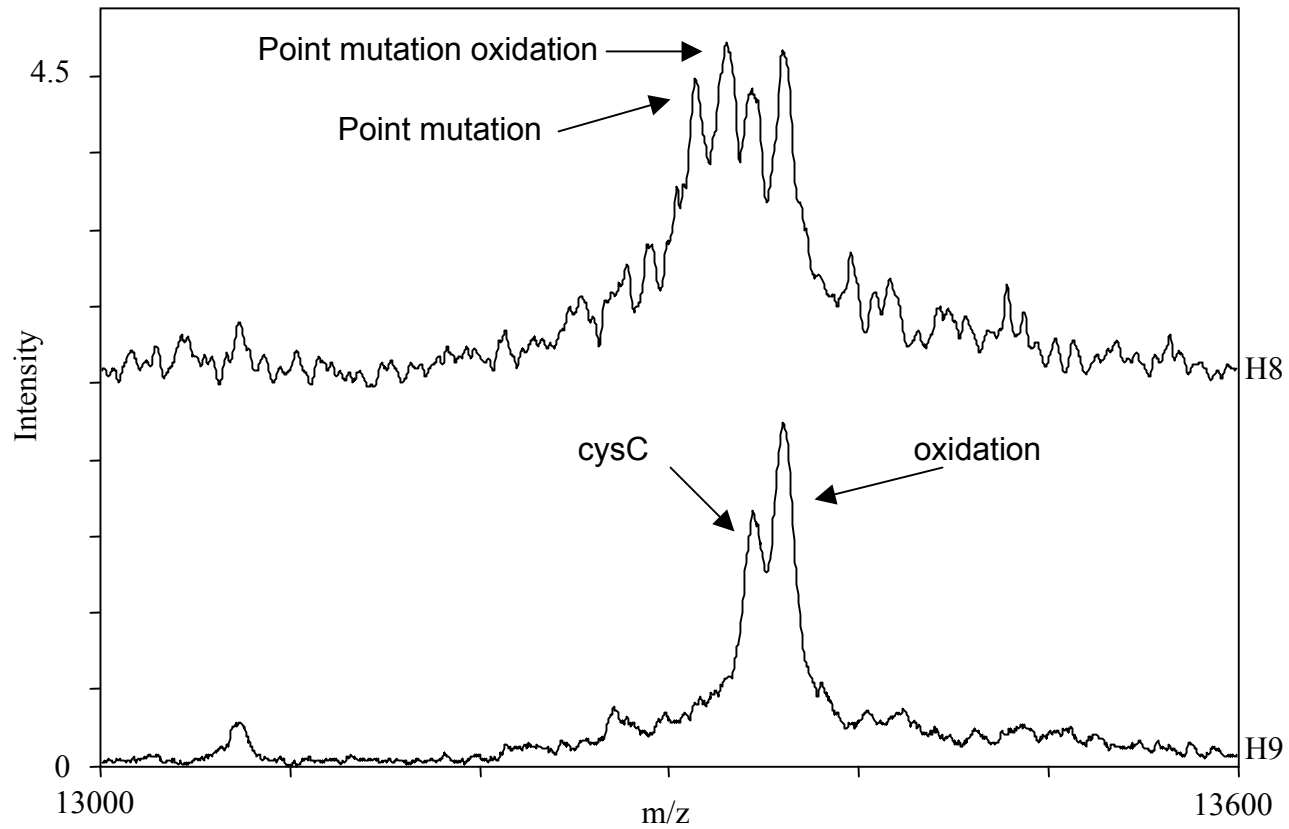

# GC Globulin

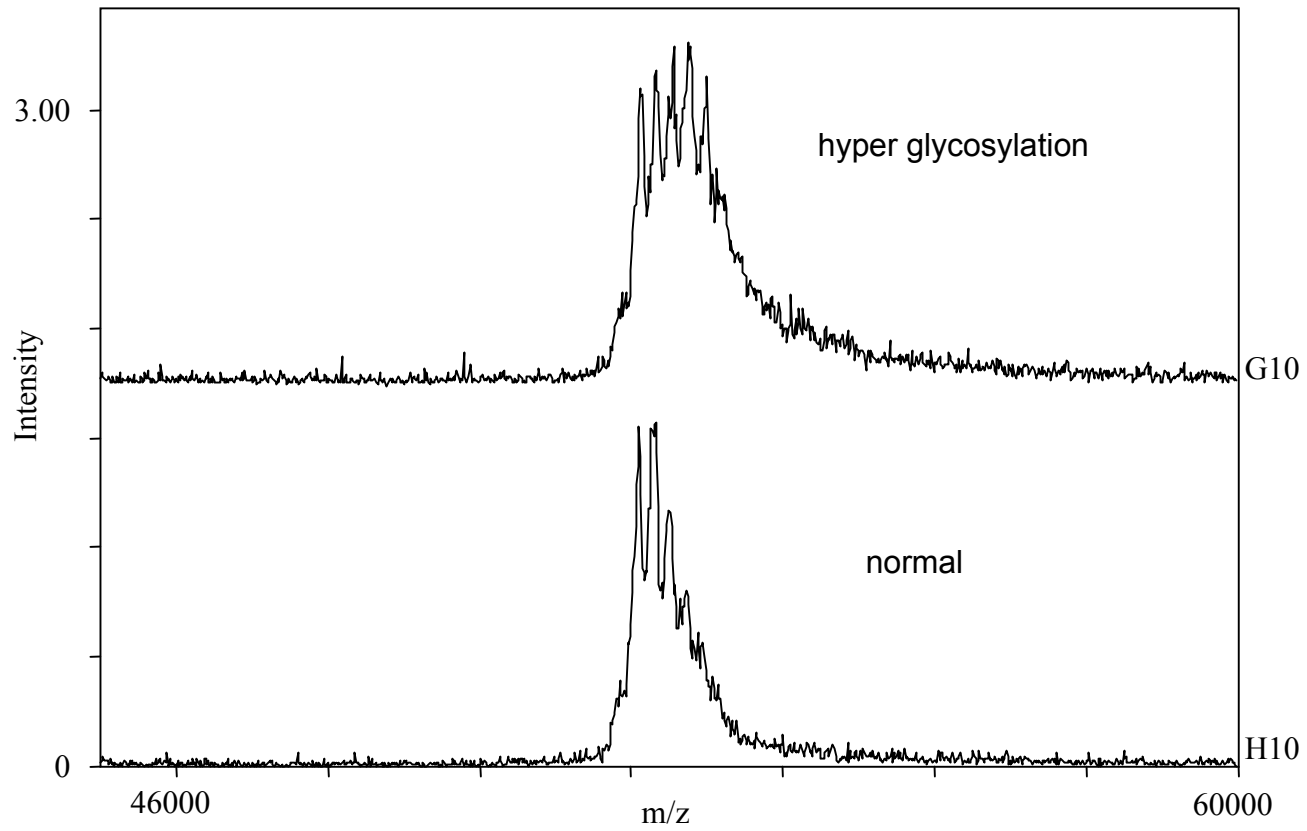

# Insulin-like growth factor II

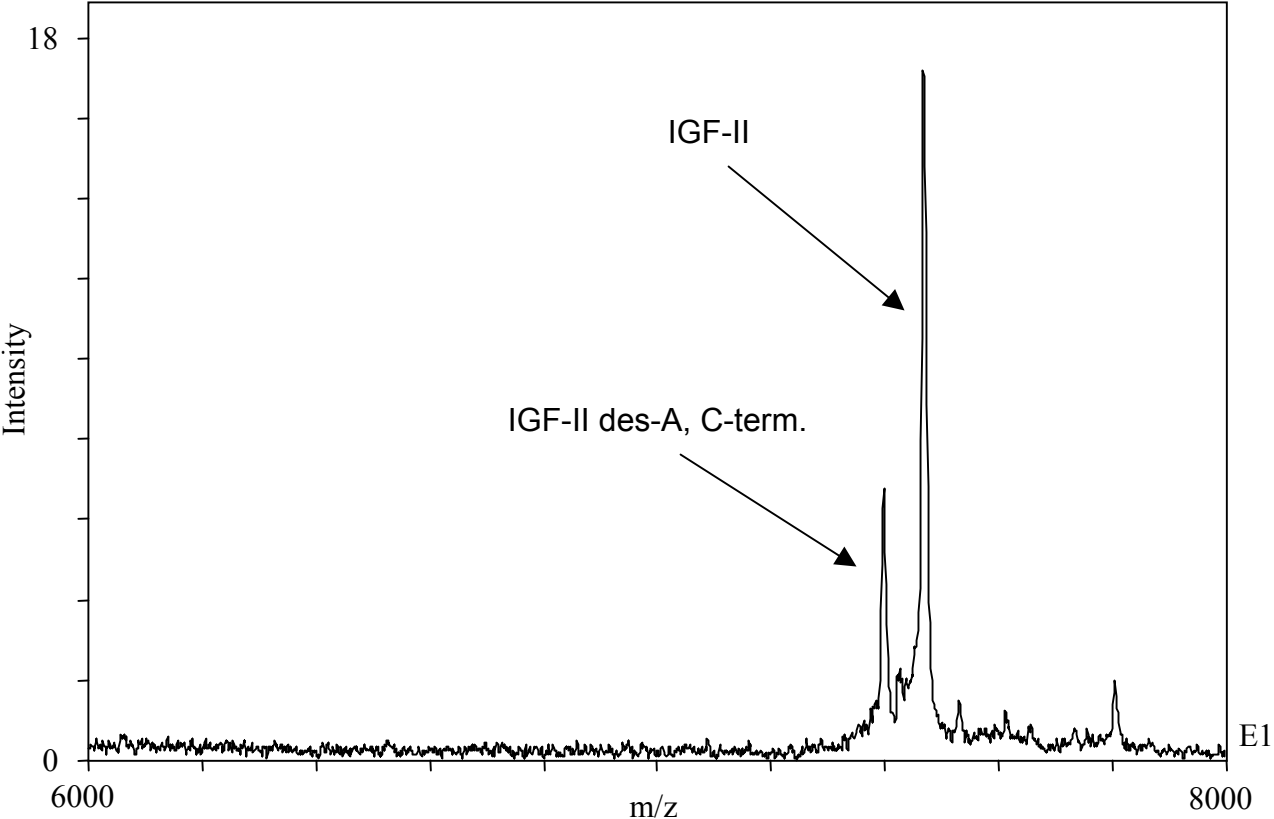

# Orosomucoid

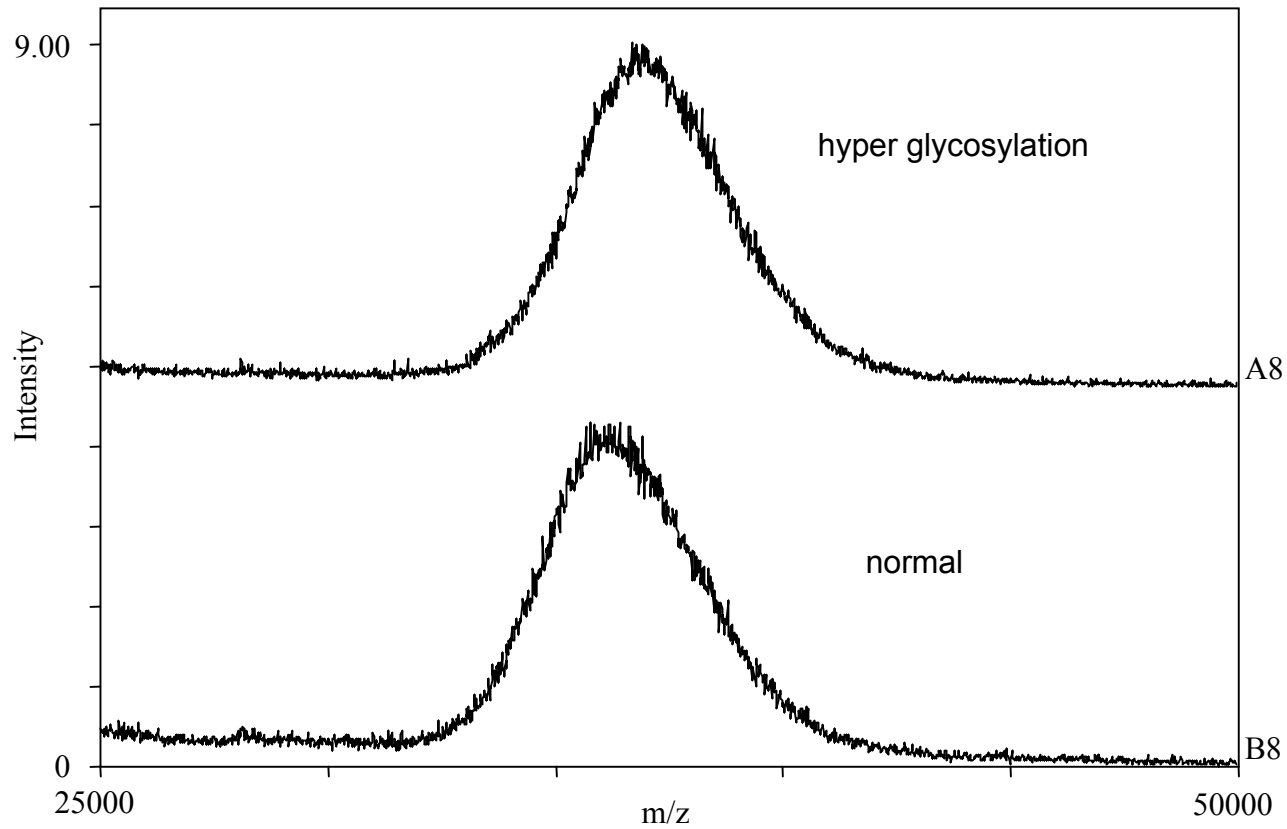



# Retinol binding protein

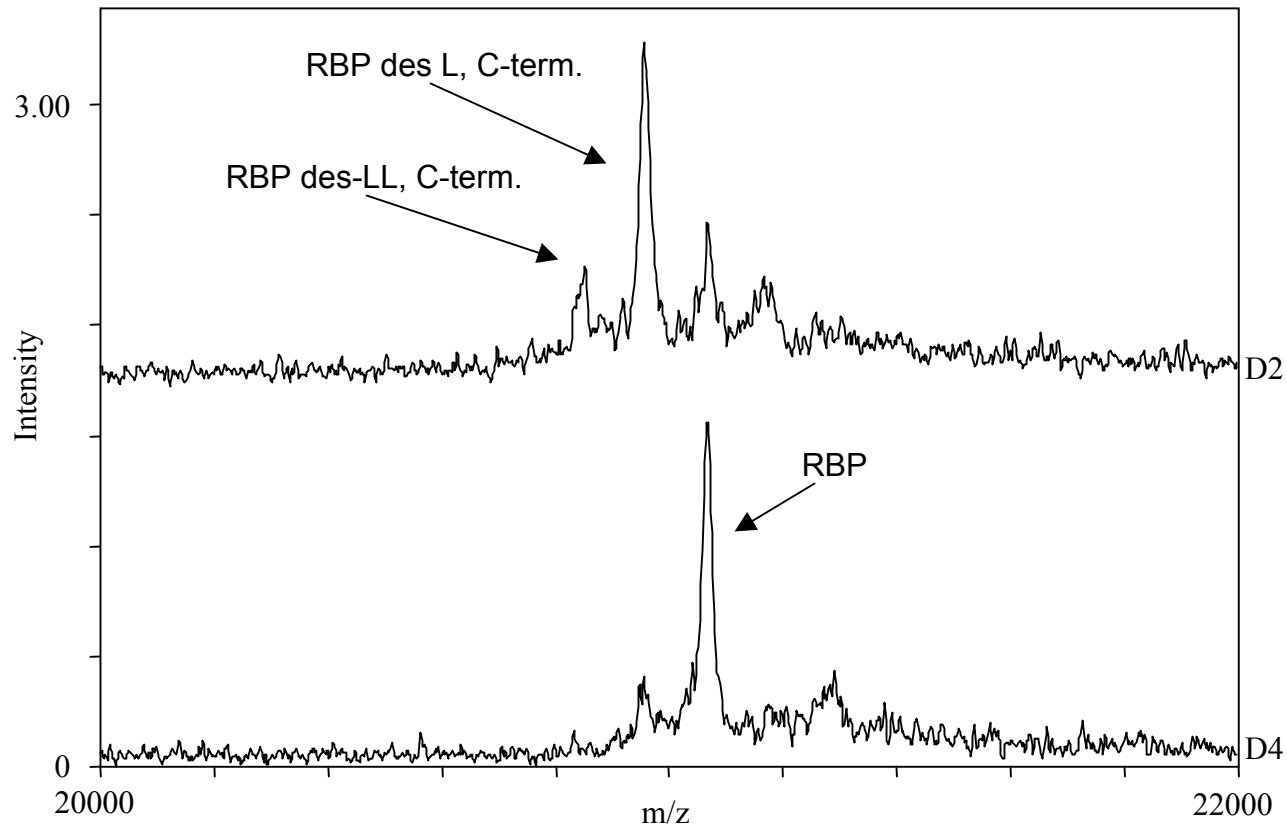

# Serum amyloid A

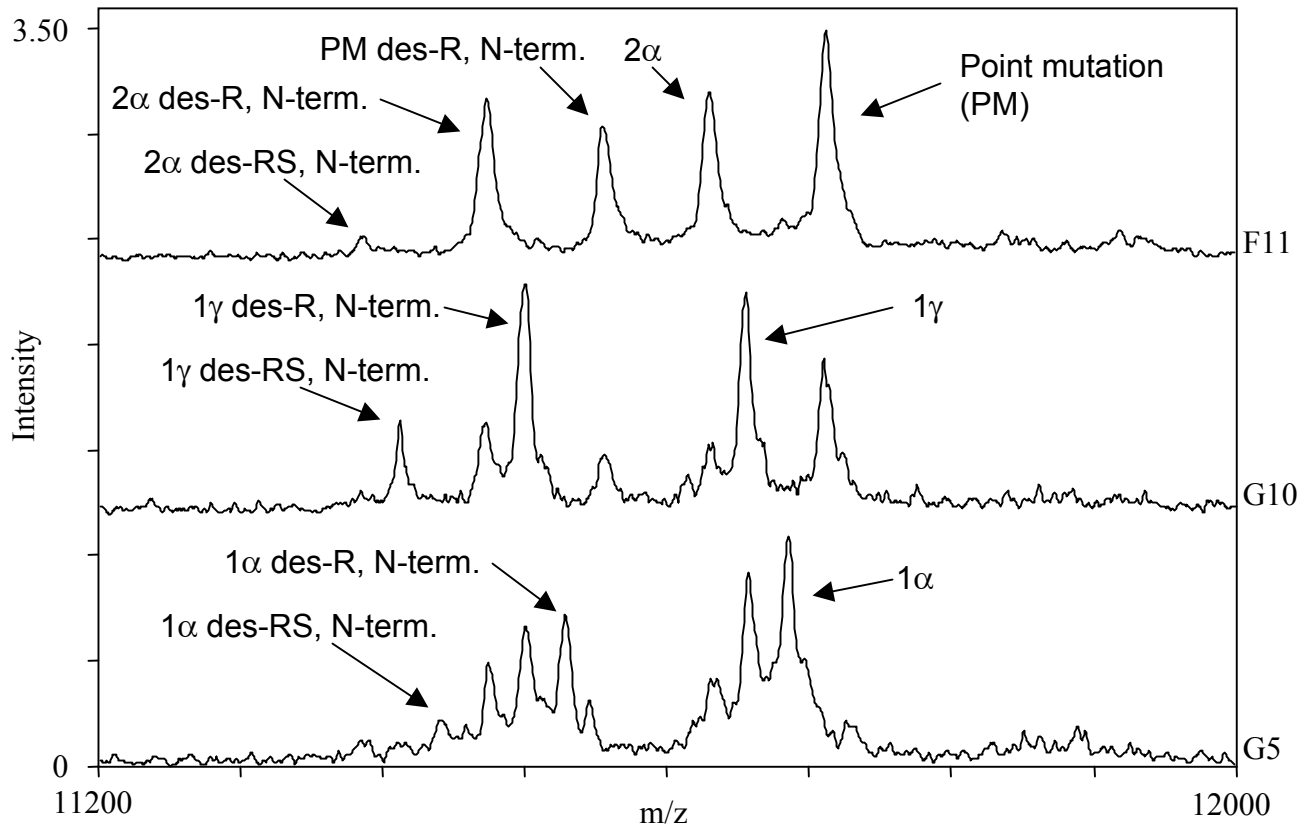

# Serum amyloid A

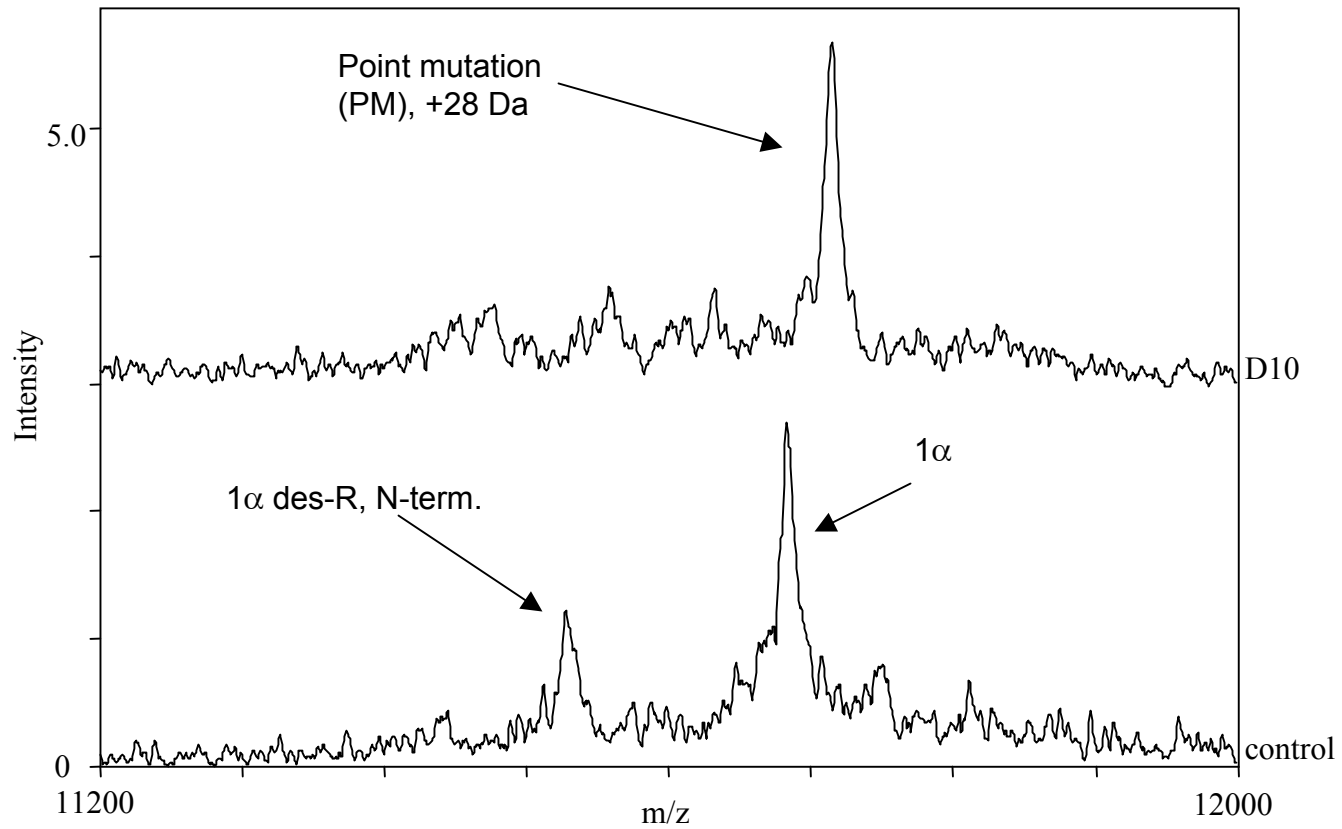

# Serum amyloid A: Digest

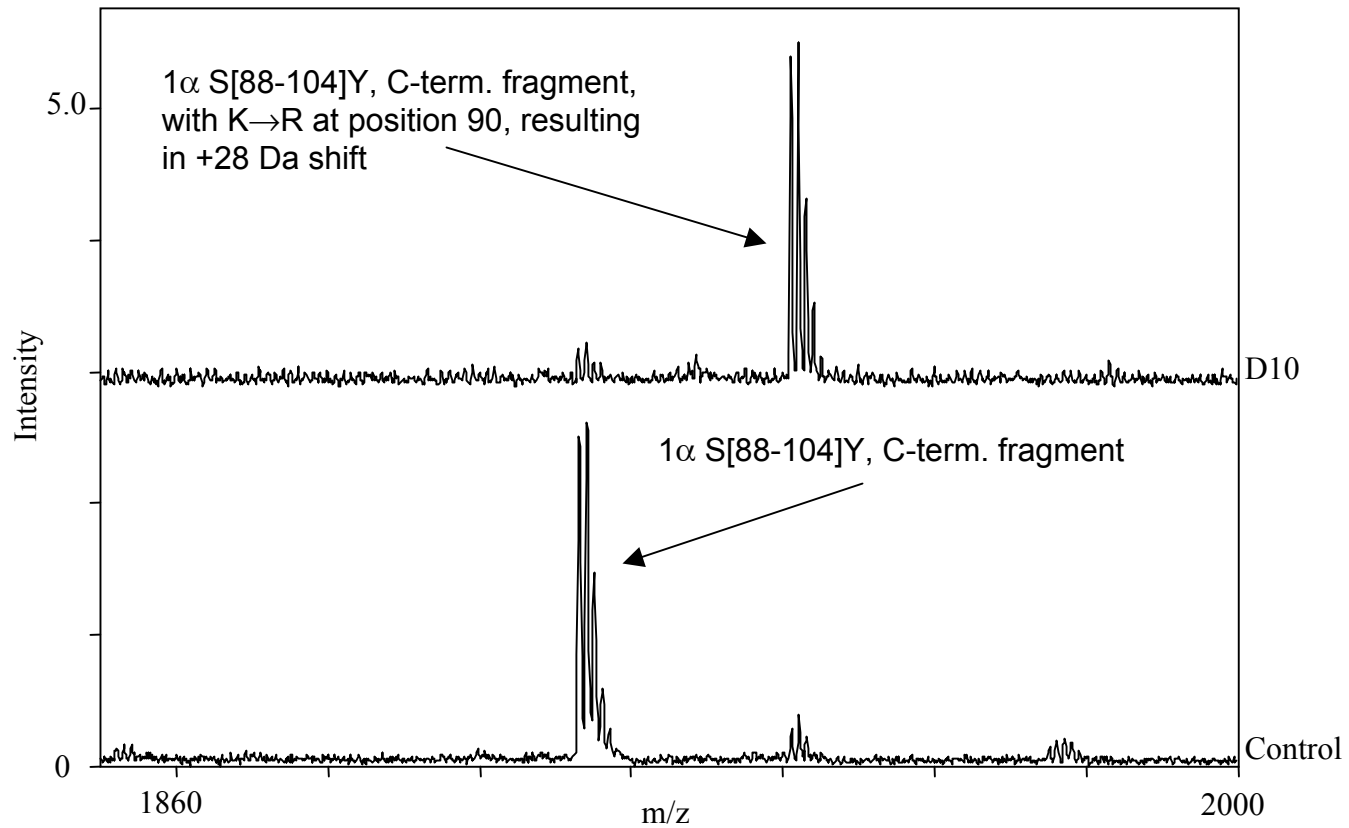

# Serum amyloid P

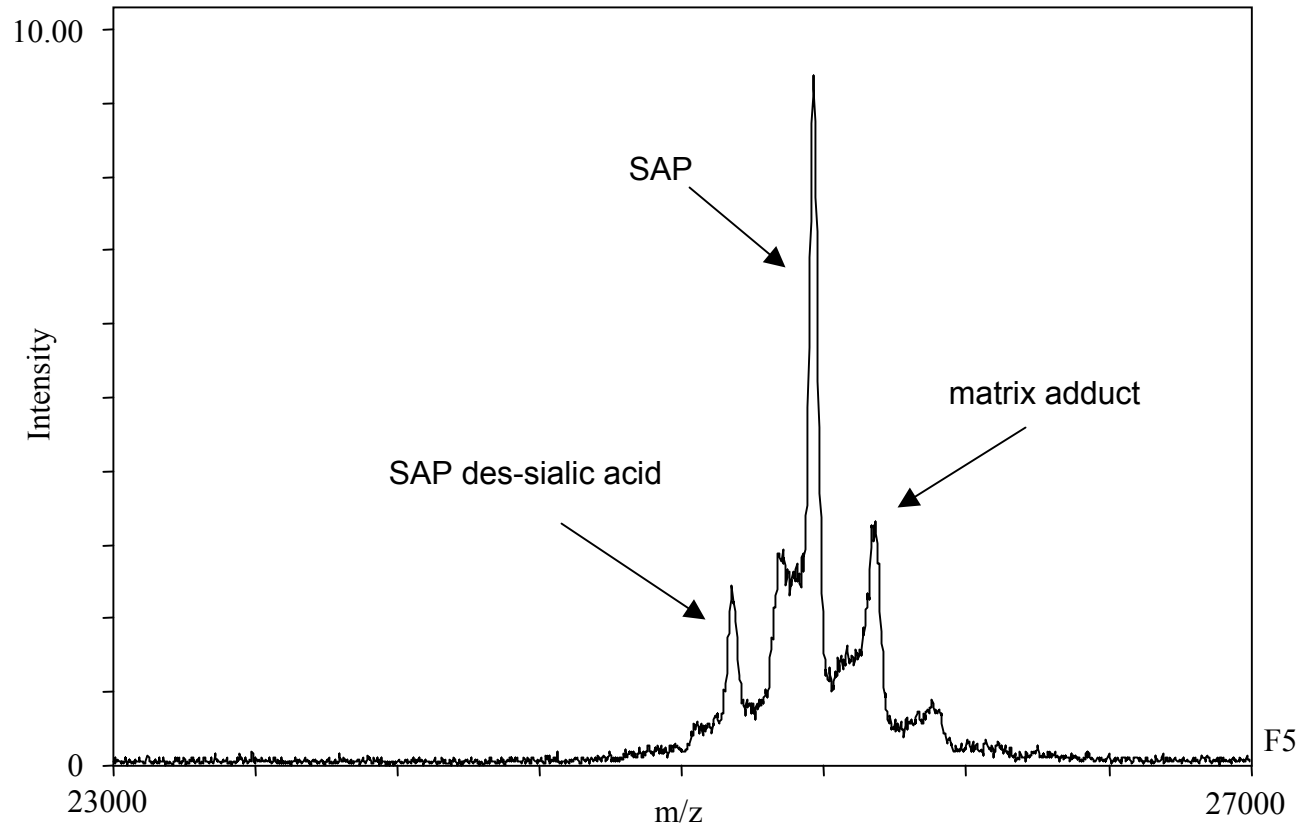

# Transferrin

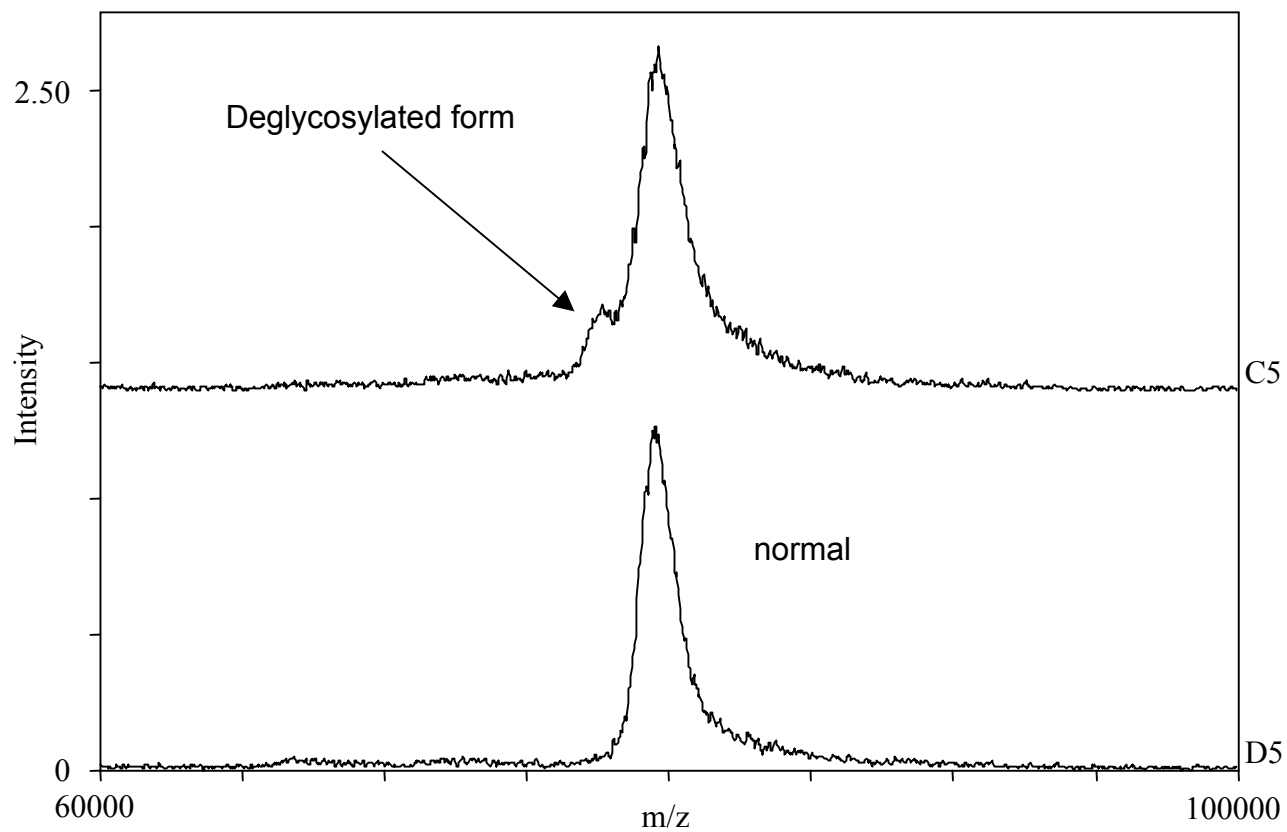

# Transthyretin

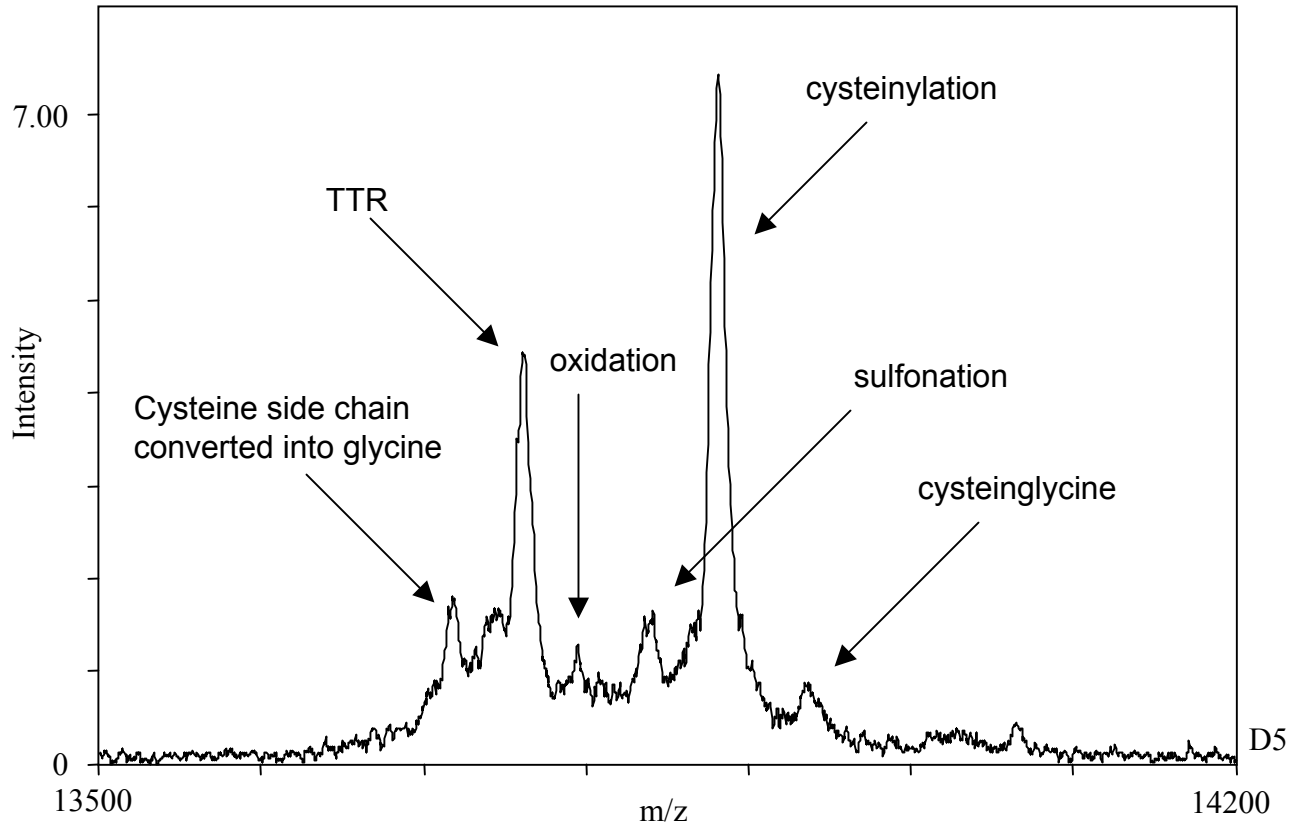

# Transthyretin

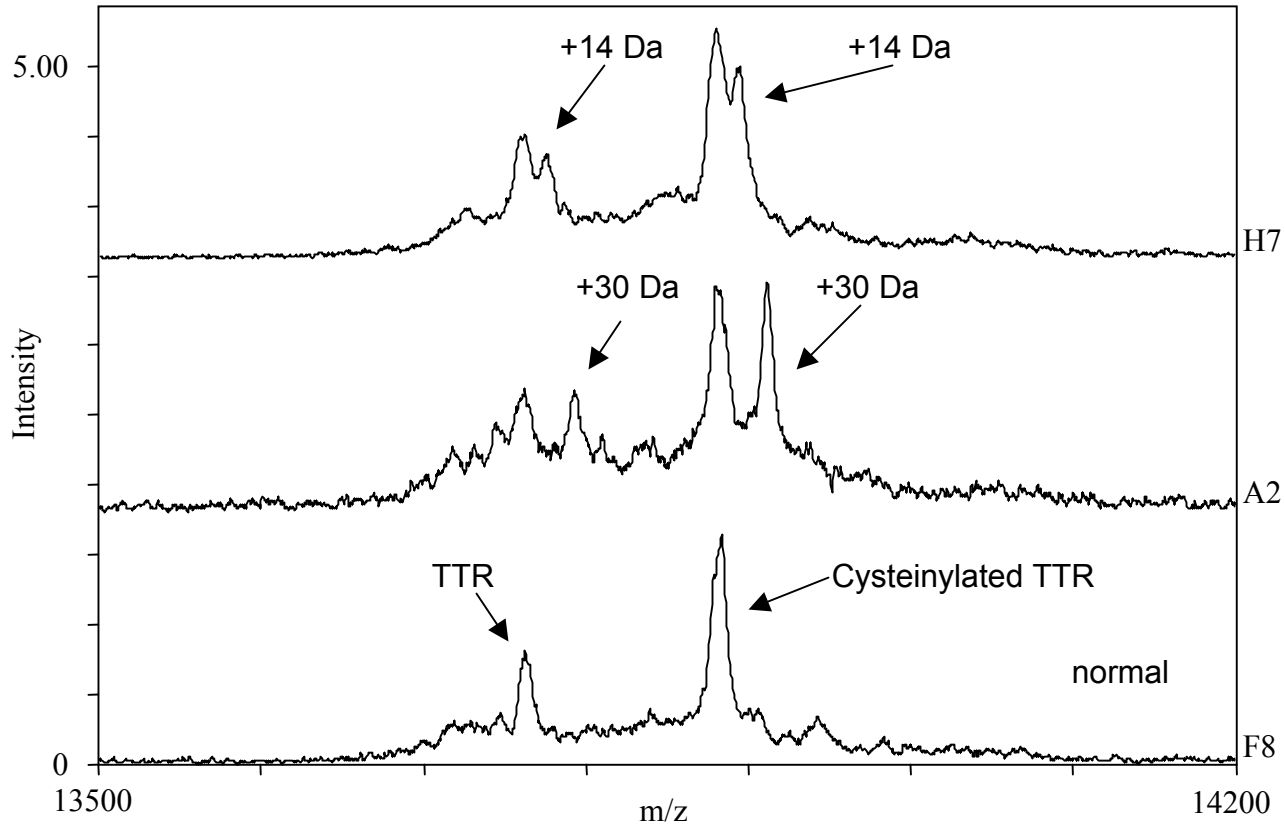



# Transthyretin digests

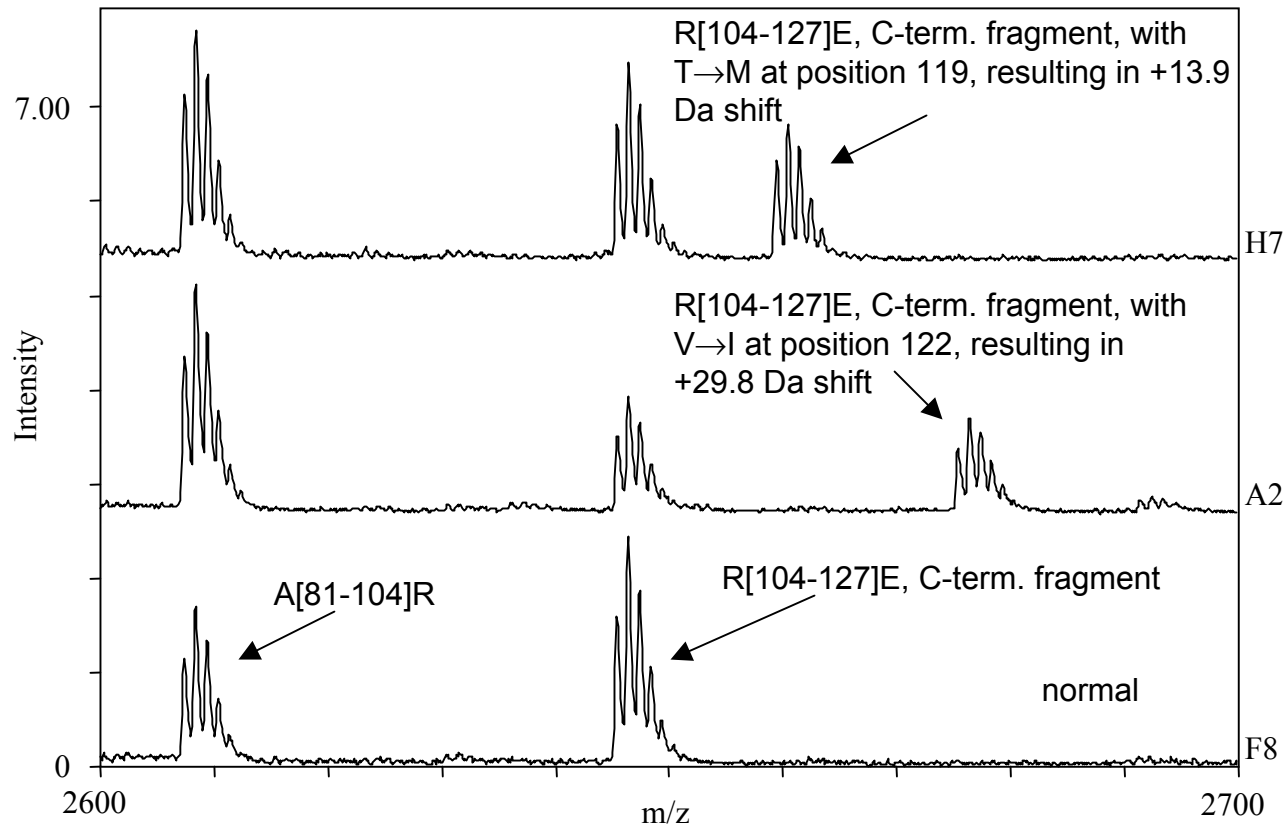

# Transthyretin

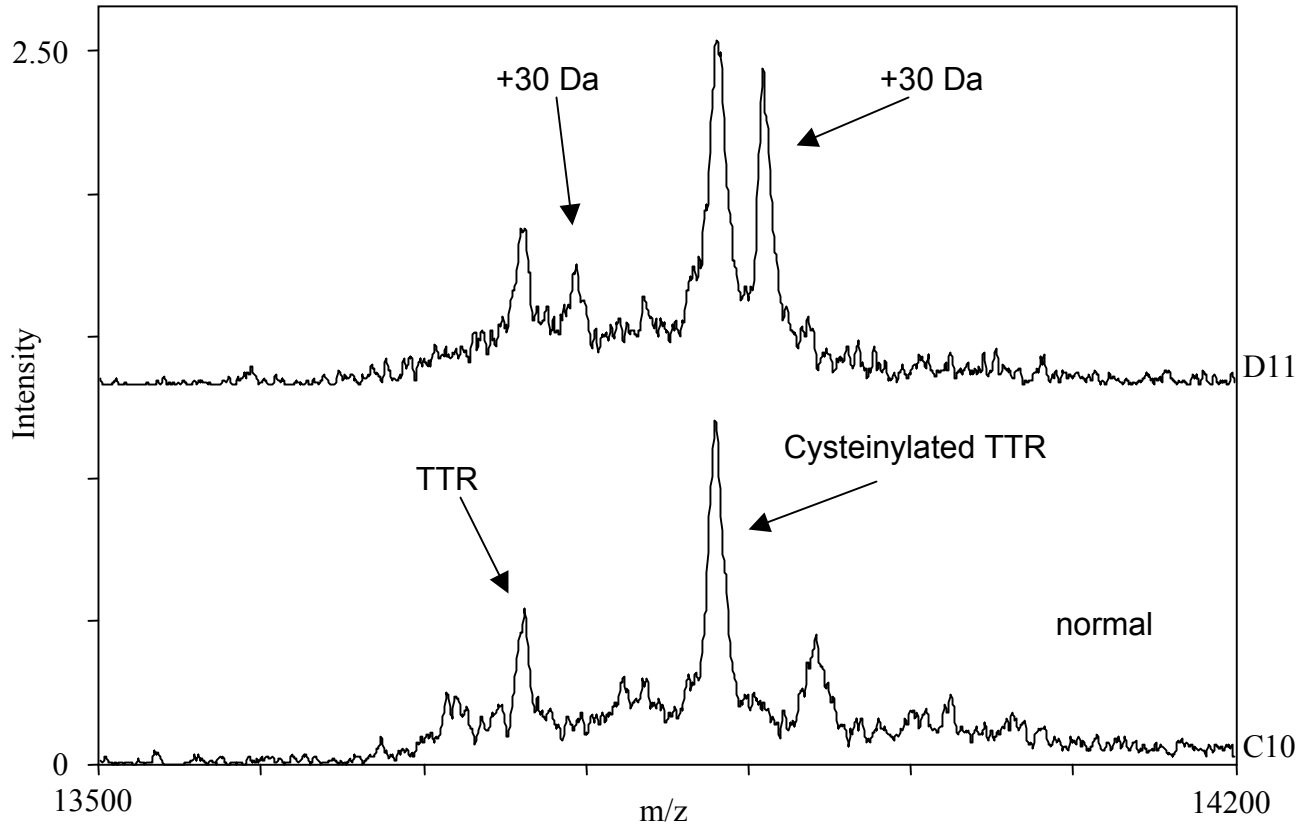

# Transthyretin digests

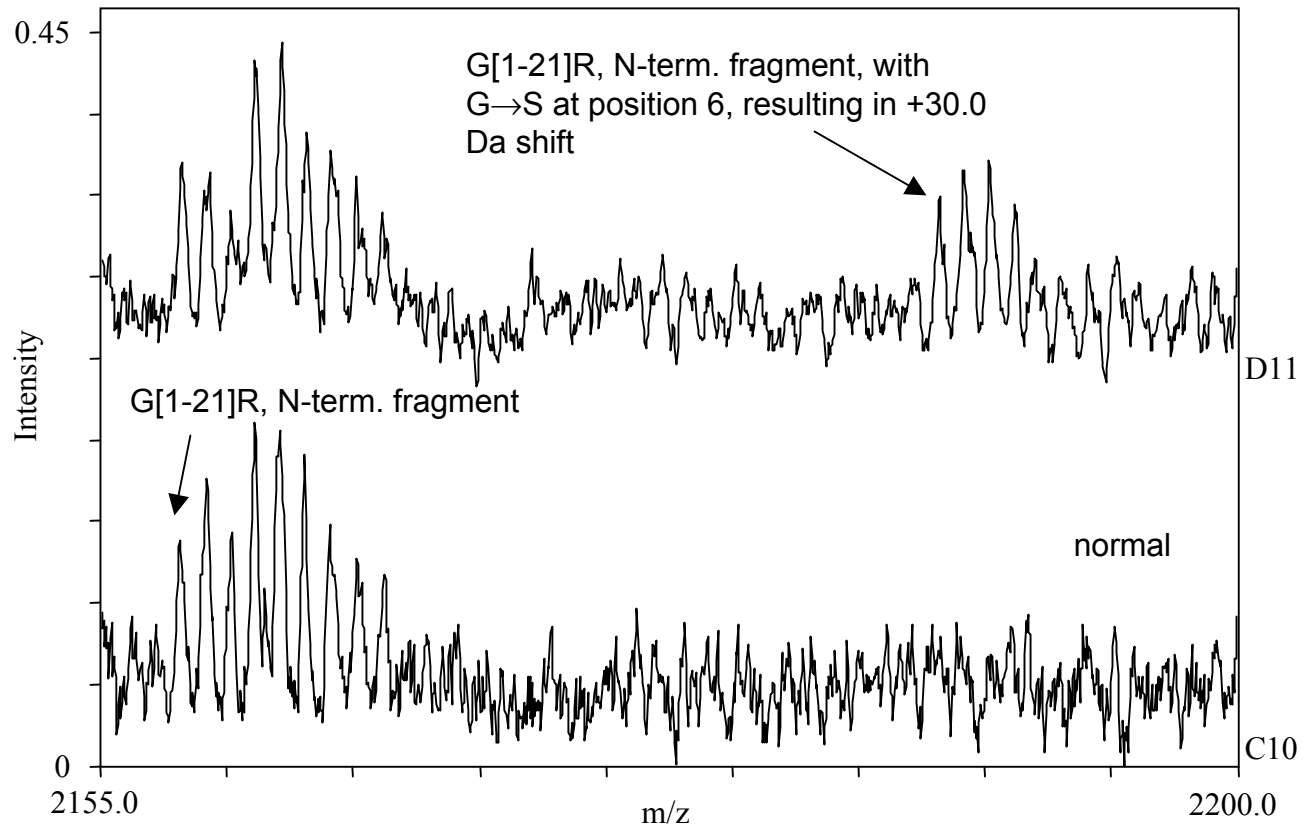

Supplement: pnas_0500426102_1.pdf [file pnas_0500426102_1.pdf]
